# Supplementary material for: TME-triggered copper-coordinated engineered programmable nanogenerators for on-demand cascade-amplifying oxidative stress
Source: Royal Society of Chemistry journal article supplement (doi:10.1039/d3tb00032j), 2023-01-01
Supplement: d3tb00032j2.pdf [file d3tb00032j2.pdf]

Electronic Supplementary Material (ESI) for Journal of Materials Chemistry B.  
This journal is © The Royal Society of Chemistry 2023
