# Supplementary material for: TME-triggered copper-coordinated engineered programmable nanogenerators for on-demand cascade-amplifying oxidative stress
Source: Royal Society of Chemistry journal article supplement (doi:10.1039/d3tb00032j), 2023-01-01
Supplement: d3tb00032j3.pdf [file d3tb00032j3.pdf]

## Supporting Information

### TME-triggered copper-coordinated engineered programmable nanogenerator for on-demand cascade-amplifying oxidative stress

Lingling Huang<sup>a</sup>, Feng Wu<sup>a</sup>, Qiuli Wang<sup>a</sup>, Jiahao Meng<sup>a</sup>, Juan Feng<sup>c</sup>, Guanghao Su<sup>d\*</sup>, Xue Yi<sup>e</sup>,  
Ying Li<sup>f</sup>, Jin-Yao Li<sup>b\*</sup>, Zhenqing Hou<sup>a\*</sup>, Zhongxiong Fan<sup>b\*</sup>

<sup>a</sup> Department of Biomaterials, College of Materials, Xiamen University, Xiamen 361005, China.

<sup>b</sup> Institute of Materia Medica & College of Life Science and Technology, Xinjiang University, Urumqi, 830017, China.

<sup>c</sup> Department of Hematology, The First Affiliated Hospital of Xiamen University and Institute of Hematology, School of Medicine, Xiamen University, Xiamen, 361003, China.

<sup>d</sup> Children's Hospital, Soochow University, Suzhou 215025, China.

<sup>e</sup> Department of Basic Medicine & Key laboratory of functional and clinical translational medicine, Fujian Province university, Xiamen Medical College, Xiamen 361021, China.

<sup>f</sup> Xiamen Key Laboratory of Traditional Chinese Bio-engineering, Xiamen Medical College, Xiamen 361021, China.

\*Corresponding authors: Dr. Guanghao Su, [E-mail: sky2skeleton@163.com](mailto:sky2skeleton@163.com); Dr. Jin-Yao Li, [E-mail: ljyxju@xju.edu.cn](mailto:ljyxju@xju.edu.cn); Dr. Zhenqing Hou, [E-mail: houzhenqing@xmu.edu.cn](mailto:houzhenqing@xmu.edu.cn); Dr. Zhongxiong Fan, [E-mail: fanzhongxiong@xju.edu.cn](mailto:fanzhongxiong@xju.edu.cn)

<sup>ORCID</sup> Zhenqing Hou: 0000-0002-5537-075X; Zhongxiong Fan: 0000-0001-5751-9530

#### 1. Supplementary Data

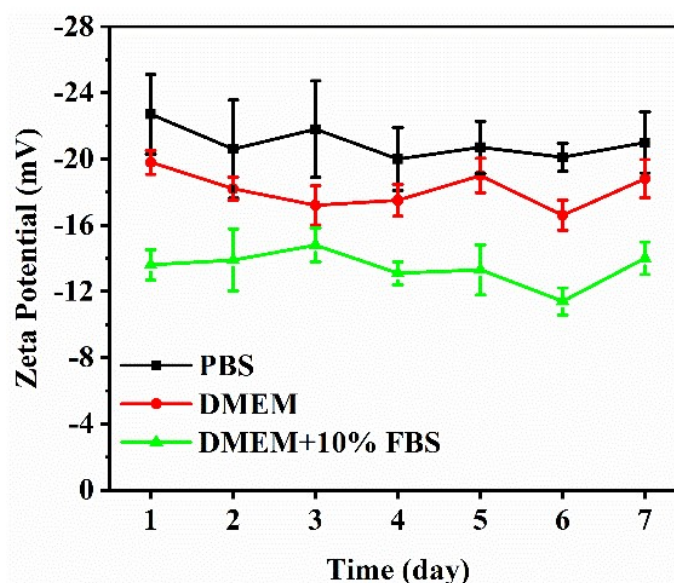

**Figure S1** Zeta potential of ECH disappeared in PBS, DMEM, and DMEM + 10% FBS for 7 d. Error bars indicate SD ( $n = 3$ ).

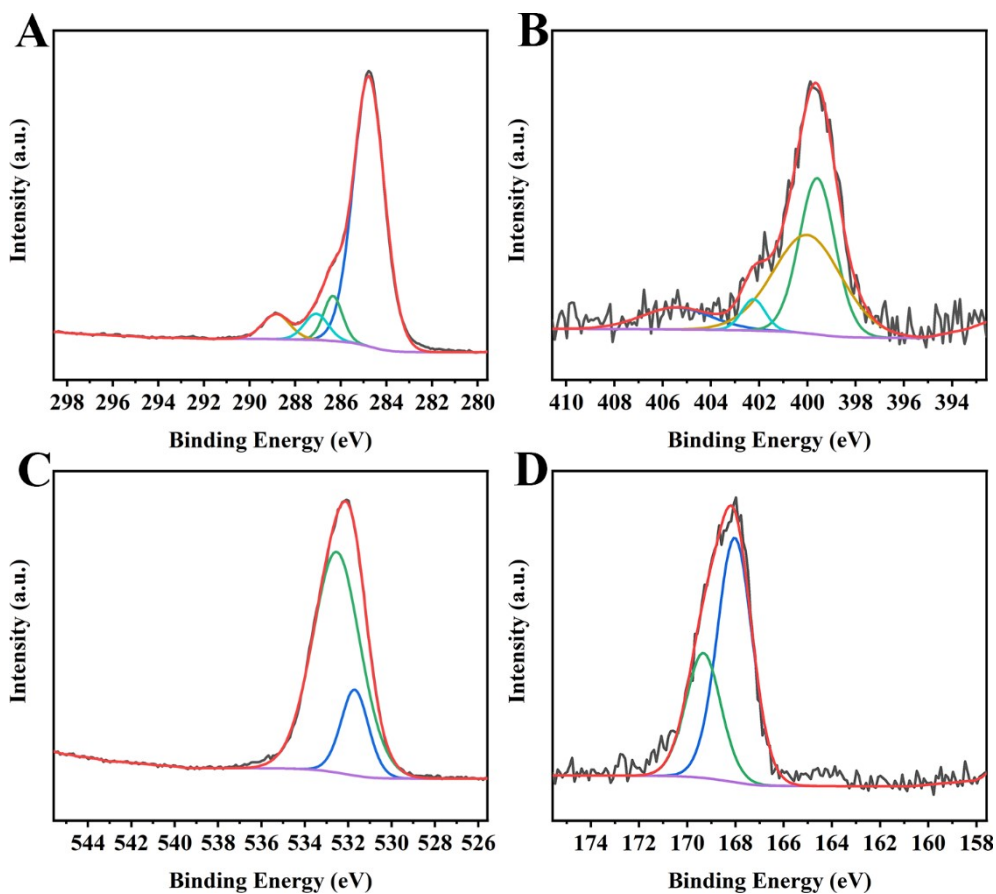

**Figure S2** XPS spectra of ECH. (A) C 1s, (B) N 1s, (C) O 1s, and (D) S 2p.

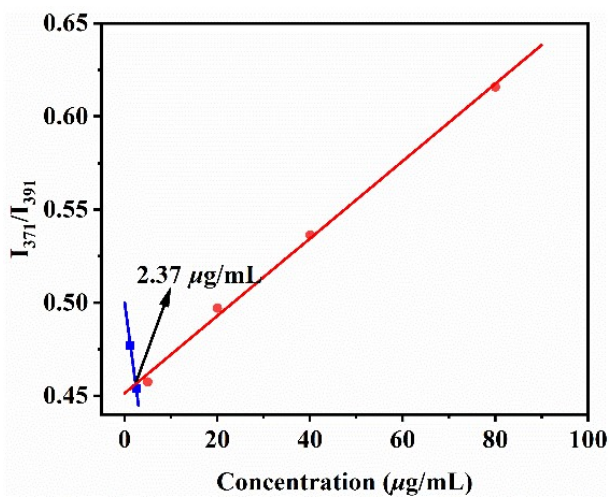

**Figure S3** The fluorescence intensity ratio ( $I_{371}/I_{391}$ ) of pyrene as a function of ECH.

**pH 5.0 + GSH**

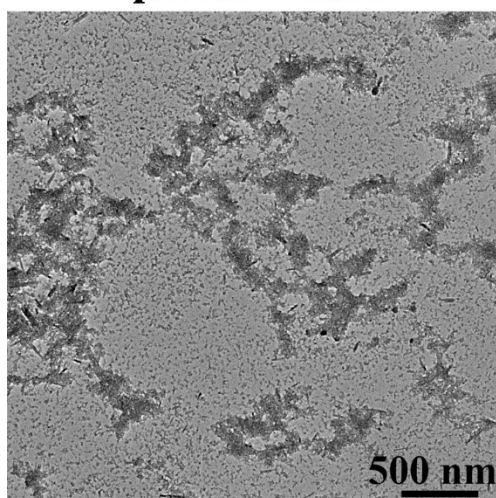

**Figure S4** TEM image of ECH dispersed in PBS containing GSH at pH 5.0 after 48 h.

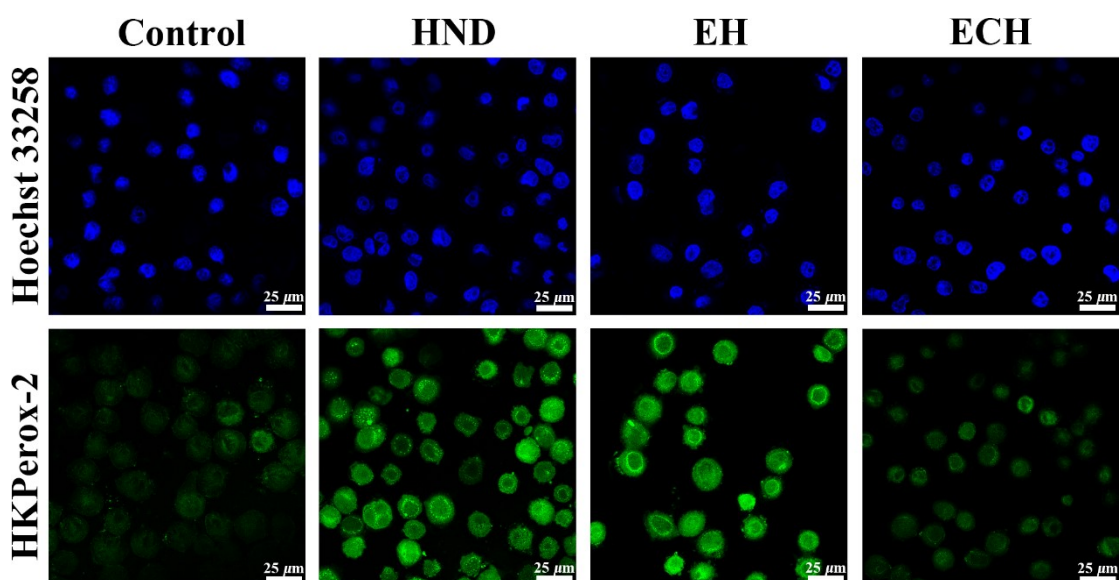

**Figure S5** CLSM images of H<sub>2</sub>O<sub>2</sub> produced in 4T1 cells incubated with HND, EH, and ECH stained with Hoechst 33258 and HKPerox-2.

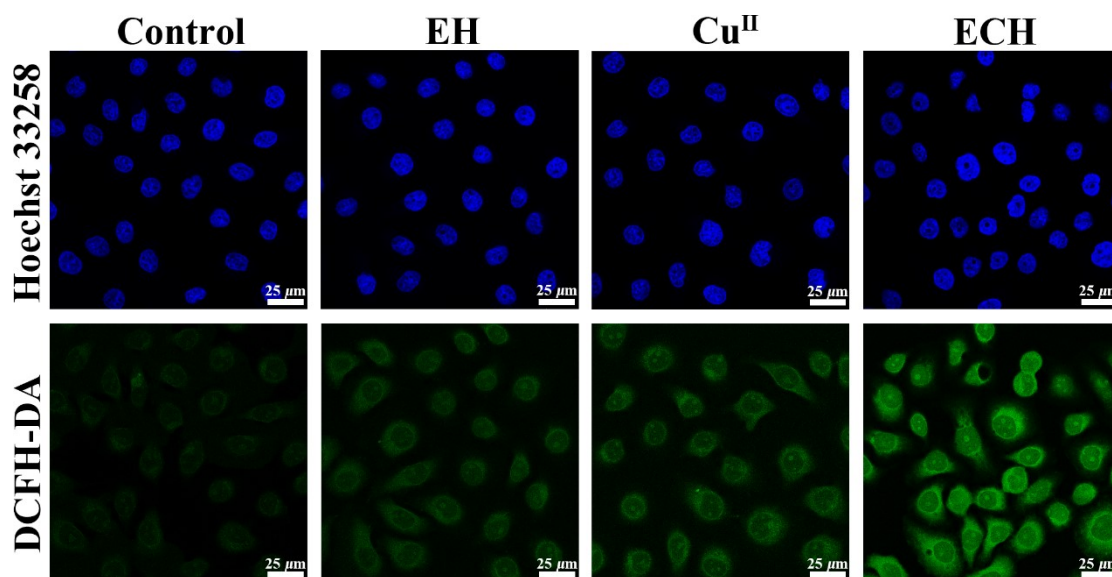

**Figure S6** CLSM images of  $\cdot\text{OH}$  produced in 4T1 cells incubated with EH,  $\text{Cu}^{\text{II}}$ , and ECH stained with Hoechst 33258 and DCFH-DA.

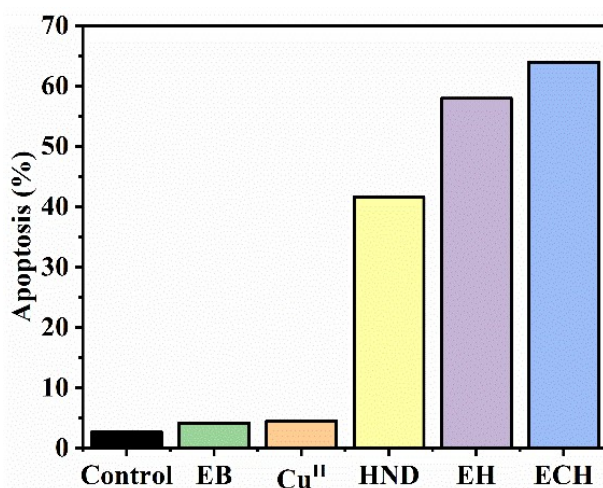

**Figure S7** Apoptotic rate (early and late apoptotic cells) of 4T1 cells cultured with EB,  $\text{Cu}^{\text{II}}$ , HND, EH, and ECH.

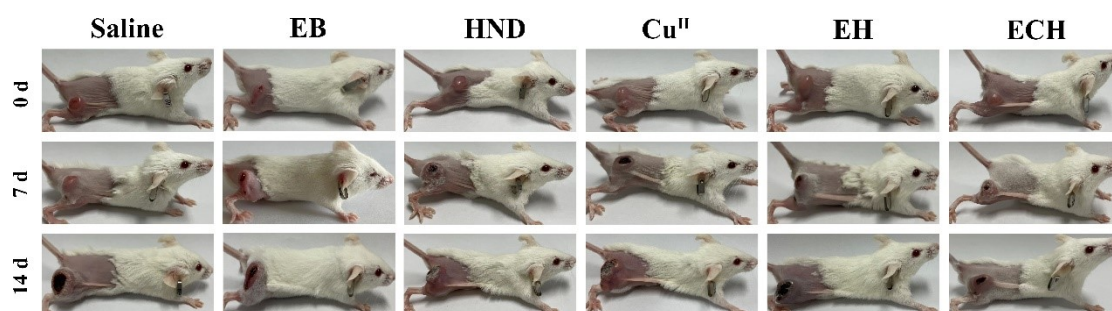

**Figure S8** Representative photographs of mice within 14 d after *i.v.* injection of saline, EB, HND,  $\text{Cu}^{\text{II}}$ , EH, and ECH.



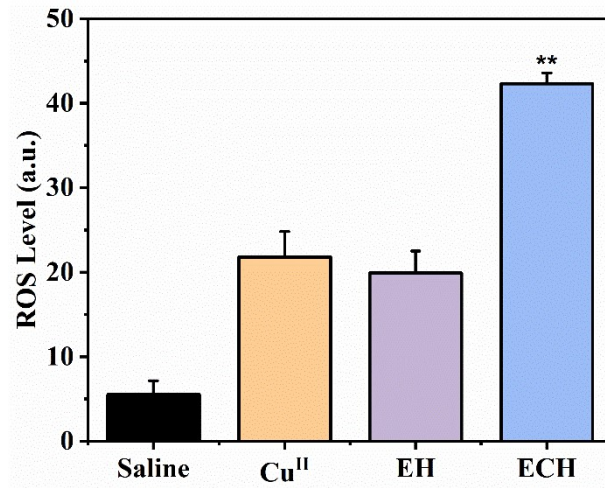

**Figure S9** Quantitative analysis of ROS levels in tumor sites after treatment with saline, Cu<sup>II</sup>, EH, and ECH. Error bars indicate SD ( $n = 5$ ), \*\* $P < 0.01$ .

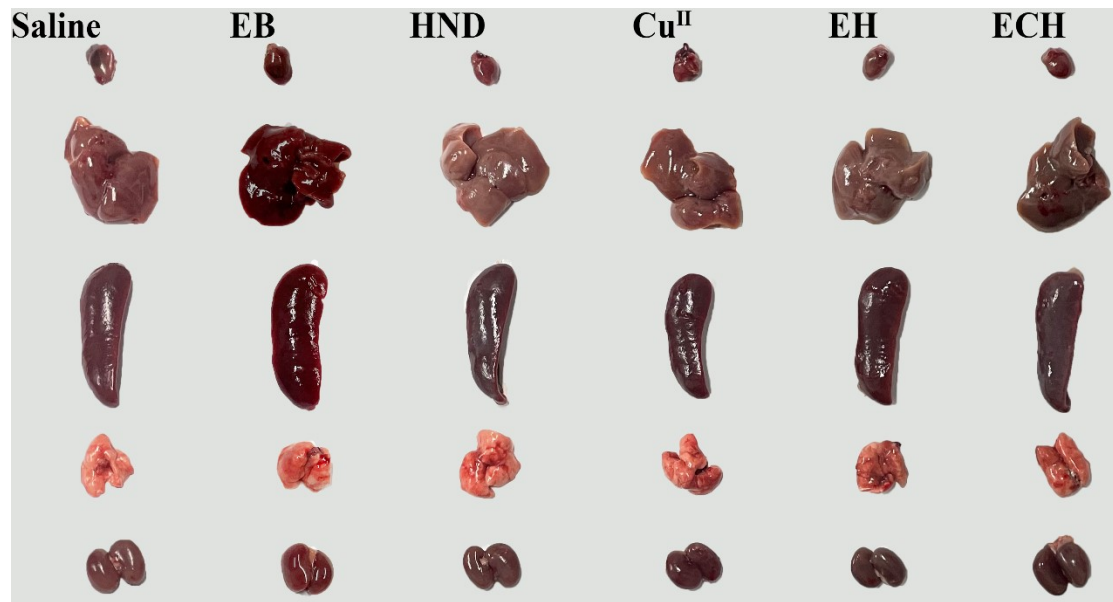

**Figure S10** Photographs of excised normal tissue sections (heart, liver, spleen, lung, and kidney) upon different therapies.

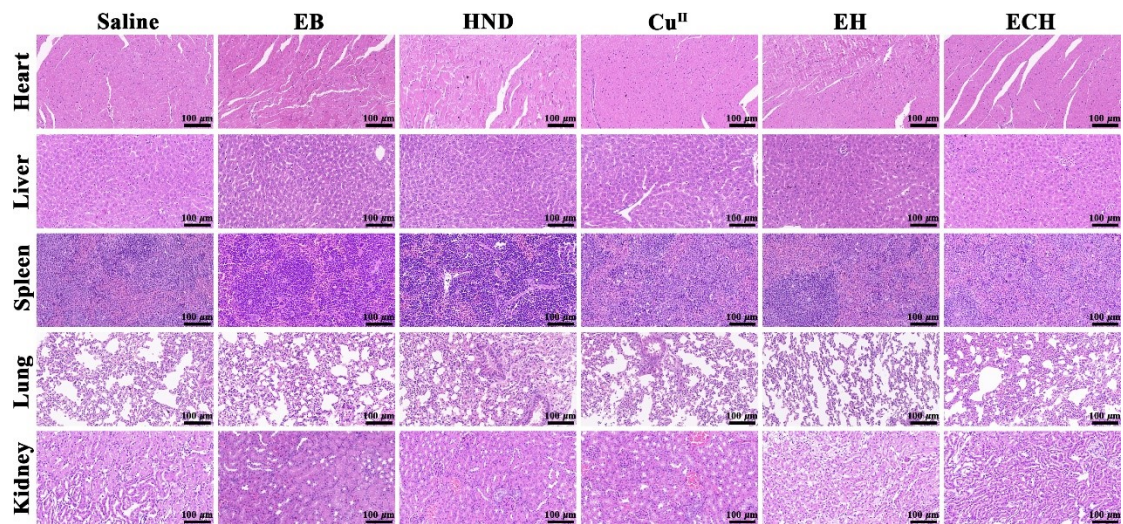

**Figure S11** H&E stained images of normal tissues involving heart, liver, spleen, lung, and kidney at 14 d after different therapies.
