# Supplementary material for: TME-triggered copper-coordinated engineered programmable nanogenerators for on-demand cascade-amplifying oxidative stress
Source: Royal Society of Chemistry journal article supplement (doi:10.1039/d3tb00032j), 2023-01-01
Supplement: d3tb00032j4.pdf [file d3tb00032j4.pdf]

| Integrated density value |          |        |
|--------------------------|----------|--------|
| Group                    | CyclinD1 | ACTIN  |
| Control                  | 545896   | 551304 |
| EB                       | 542047   | 566693 |
| Cu <sup>II</sup>         | 546077   | 566847 |
| HND                      | 142975   | 562706 |
| EH                       | 142377   | 565599 |
| ECH                      | 100470   | 573756 |

| Ratio            |          |
|------------------|----------|
| Group            | CyclinD1 |
| Control          | 0.99     |
| EB               | 0.96     |
| Cu <sup>II</sup> | 0.96     |
| HND              | 0.25     |
| EH               | 0.25     |
| ECH              | 0.18     |
